# Supplementary material
Source: PubMed Central journal article supplement (PMC5119044)
Supplement: AAC.01603-16_zac012165756so1.pdf [file AAC.01603-16_zac012165756so1.pdf]

**Table S1.** Primers used in this study.

---

Primers for *acrAB* gene deletion (5'-3')

---

|                    |                                                                            |
|--------------------|----------------------------------------------------------------------------|
| <i>acrAB-kan-F</i> | TTAACTTTTGACCATTGACCAATTTGAAATCGGACACTCGAGGTT<br>TACATGTGTAGGCTGGAGCTGCTTC |
| <i>acrAB-kan-R</i> | GTTATGCATAAAAAAGGCCGCTTGCGCGGCCTTAGTGATTACACGT<br>TGTACATATGAATATCCTCCTTAG |

---

Primers for *mlaA* gene deletion and complementation (5'-3')

---

|                   |                                                                              |
|-------------------|------------------------------------------------------------------------------|
| <i>mlaA-kan-F</i> | CTTAATAAGAAAAAAGGTGAGTTTTGCGACTCACCTTTTTTGTTT<br>GTTTCGTGTAGGCTGGAGCTGCTTC   |
| <i>mlaA-kan-R</i> | CCGTCATGGATGGCAAACCTGCATAAGCCATAAAAAAACAGGGAGA<br>CATTTTCATATGAATATCCTCCTTAG |
| <i>mlaA-com-F</i> | GCGGGAGTTACTCTGAAAATGTAG                                                     |
| <i>mlaA-com-R</i> | ATCGTTTGTGGTTAAGTGCTGG                                                       |

---

**Table S2.** MICs of tigecycline-resistant mutants and parental strains to different antibiotics.

| Strains                           | MIC ( $\mu\text{g}/\text{mL}$ ) <sup>a</sup> |                  |                  |                  |                  |                  |                  |                  |                  |                  |                  |                  |                  |
|-----------------------------------|----------------------------------------------|------------------|------------------|------------------|------------------|------------------|------------------|------------------|------------------|------------------|------------------|------------------|------------------|
|                                   | CTX <sup>c</sup>                             | FEP <sup>c</sup> | ATM <sup>c</sup> | IPM <sup>c</sup> | MEM <sup>c</sup> | CIP <sup>c</sup> | LVX <sup>c</sup> | CST <sup>c</sup> | AMK <sup>c</sup> | CHL <sup>c</sup> | TET <sup>c</sup> | MIN <sup>c</sup> | TGC <sup>b</sup> |
| ATCC 25922                        | 0.19                                         | 0.125            | 0.125            | 0.5              | 0.094            | 0.012            | 0.032            | 0.25             | 3                | 3                | 1.5              | 0.75             | 0.125            |
| 25922-TGC8                        | 0.25                                         | 0.19             | 0.125            | 1                | 0.125            | 0.016            | 0.047            | 0.25             | 3                | 6                | 8                | 8                | 8                |
| 25922 $\Delta$ <i>acrAB</i>       | 0.047                                        | 0.064            | 0.125            | 0.38             | 0.094            | 0.012            | 0.008            | 0.125            | 2                | 1                | 1                | 0.38             | 0.0625           |
| 25922 $\Delta$ <i>acrAB</i> -TGC8 | 0.5                                          | 0.5              | 0.38             | 0.75             | 0.19             | 0.016            | 0.016            | 0.38             | 3                | 12               | 12               | 12               | 8                |

<sup>a</sup>Abbreviations: CTX, cefotaxime; FEP, cefepime; ATM, aztreonam; IPM, imipenem; MEM, meropenem; CIP, ciprofloxacin; LVX, levofloxacin; CST, colistin; AMK, amikacin; CHL, chloramphenicol; TET, tetracycline; MIN, minocycline; TGC, tigecycline;

<sup>b</sup>Tested by standard broth microdilution tests;

<sup>c</sup>Tested by Etest method.

**Table S3.** Strains used in this study.

| Strains                                                                               | Description                                                                                               | References |
|---------------------------------------------------------------------------------------|-----------------------------------------------------------------------------------------------------------|------------|
| 25922                                                                                 | Wild-type                                                                                                 | ATCC 25922 |
| 25922 $\Delta$ <i>mlaA</i>                                                            | ATCC 25922 deletion of <i>mlaA</i>                                                                        | This study |
| 25922 $\Delta$ <i>mlaA</i> /pCR <sup>®</sup> 2.1                                      | ATCC 25922 deletion of <i>mlaA</i> , complemented with empty pCR <sup>®</sup> 2.1 vector                  | This study |
| 25922 $\Delta$ <i>mlaA</i> /pCR <sup>®</sup> 2.1- <i>mlaA</i>                         | ATCC 25922 deletion of <i>mlaA</i> , complemented with wild-type <i>mlaA</i>                              | This study |
| 25922 $\Delta$ <i>mlaA</i> /pCR <sup>®</sup> 2.1- <i>mlaA</i> +                       | ATCC 25922 deletion of <i>mlaA</i> , complemented with mutational-type <i>mlaA</i>                        | This study |
| 25922 $\Delta$ <i>acrAB</i>                                                           | ATCC 25922 deletion of <i>acrAB</i>                                                                       | This study |
| 25922 $\Delta$ <i>acrAB</i> $\Delta$ <i>mlaA</i>                                      | ATCC 25922 deletion of <i>acrAB</i> and <i>mlaA</i>                                                       | This study |
| 25922 $\Delta$ <i>acrAB</i> $\Delta$ <i>mlaA</i> /pCR <sup>®</sup> 2.1                | ATCC 25922 deletion of <i>acrAB</i> and <i>mlaA</i> , complemented with empty pCR <sup>®</sup> 2.1 vector | This study |
| 25922 $\Delta$ <i>acrAB</i> $\Delta$ <i>mlaA</i> /pCR <sup>®</sup> 2.1- <i>mlaA</i>   | ATCC 25922 deletion of <i>acrAB</i> and <i>mlaA</i> , complemented with wild-type <i>mlaA</i>             | This study |
| 25922 $\Delta$ <i>acrAB</i> $\Delta$ <i>mlaA</i> /pCR <sup>®</sup> 2.1- <i>mlaA</i> + | ATCC 25922 deletion of <i>acrAB</i> and <i>mlaA</i> , complemented with mutational-type <i>mlaA</i>       | This study |

**Table S4.** Series of tigecycline MICs change during the gene deletion and complementation experiment.

| Strain                                                               | Tigecycline<br>MIC ( $\mu\text{g/mL}$ ) |
|----------------------------------------------------------------------|-----------------------------------------|
| 25922                                                                | 0.125                                   |
| 25922 $\Delta mlaA$                                                  | 0.125                                   |
| 25922 $\Delta mlaA$ /pCR <sup>®</sup> 2.1                            | 0.125                                   |
| 25922 $\Delta mlaA$ /pCR <sup>®</sup> 2.1- <i>mlaA</i>               | 0.125                                   |
| 25922 $\Delta mlaA$ /pCR <sup>®</sup> 2.1- <i>mlaA</i> +             | 1                                       |
| 25922 $\Delta acrAB$                                                 | 0.0625                                  |
| 25922 $\Delta acrAB\Delta mlaA$                                      | 0.0625                                  |
| 25922 $\Delta acrAB\Delta mlaA$ /pCR <sup>®</sup> 2.1                | 0.0625                                  |
| 25922 $\Delta acrAB\Delta mlaA$ /pCR <sup>®</sup> 2.1- <i>mlaA</i>   | 0.0625                                  |
| 25922 $\Delta acrAB\Delta mlaA$ /pCR <sup>®</sup> 2.1- <i>mlaA</i> + | 0.5                                     |

**Table S5.** The existence of three mutated loci (*mlaA*, *marR* and *rpsJ*) in the series isolates that stored in each step of the induction experiment of 25922-TGC8 (tigecycline MIC from 0.25 µg/mL to 8 µg/mL).

| Reference position | Gene mutation                    | Occurrence of mutations <sup>a</sup> |         |         |         |
|--------------------|----------------------------------|--------------------------------------|---------|---------|---------|
|                    |                                  | 0.25 µg/mL                           | 1 µg/mL | 4 µg/mL | 8 µg/mL |
| 286573             | <i>mlaA</i><br>(Deletion43-44NF) | NA                                   | +       | +       | +       |
| 3541486            | <i>marR</i><br>(G104D)           | NA                                   | NA      | +       | +       |
| 1300420            | <i>rpsJ</i><br>(G57L)            | NA                                   | NA      | NA      | +       |

<sup>a</sup> This column lists the concentration of tigecycline at which the mutations occurred. NA, mutation not found; +, mutation has occurred.
